# Supplementary material for: Treating patients with driving phobia by virtual reality exposure therapy – a pilot study
Source: PLoS One. 2020 Jan 7;15(1):e0226937. doi: 10.1371/journal.pone.0226937 (PMC6946146; doi:10.1371/journal.pone.0226937)
Supplement: S1 Dataset — (XLSX) [file pone.0226937.s002.xlsx]

## Sheet: Data
RandomNo	Group	Age	Sex	S_preference_Expo	Responder	Symptoms_Duration	afq_pa_pre	afq_pre1_WG	afq_pre2_WG	afq_pa_post	afq_pa_diff	pss_sr_pre	pss_sr_post	pss_sr_diff	bai_pre	bai_pre2	bai_post	bai_diff	bdi_pre	bdi_pre2	bdi_post	bdi_diff	FPTM_strain	FPTM_hope	FPTM_denial	FPTM_knowledge	FPTM_initiative	FPTM_care	ES1_S1_SUD_Max	ES1_S1_Pulse_Max	ES1_S1_SUD_End	ES1_S1_Pulse_End	ES1_S2_SUD_Max	ES1_S2_Pulse_Max	ES1_S2_SUD_End	ES1_S2_Pulse_End	ES1_S3_SUD_Max	ES1_S3_Pulse_Max	ES1_S3_SUD_End	ES1_S3_Pulse_End	ES1_S4_SUD_Max	ES1_S4_Pulse_Max	ES1_S4_SUD_End	ES1_S4_Pulse_End	ES1_PulseBase	ES2_S1_SUD_Max	ES2_S1_Pulse_Max	ES2_S1_SUD_End	ES2_S1_Pulse_End
101	2	28	1	1	1	7.5	30	22	30	6	24	46	15	31	45	46	8	37	35	34	15	20	53	61	38	53	45	34	7	95	5	92	6	82	4	81									70	8	93	3	95
103	1	40	1	0	1	49						4	0	4	12		12	0	2		2	0	39	47	40	49	53	46	5	78	4	78	5		2										79	4		2	78
104	2	28	2	1	1	24	40	44	40	4	36	11	1	10	20	28	3	17	21	18	0	21	50	47	47	45	49	45	3	84	1	84	6		2		4	80	2	81	3	84	3	84	71	9		2	82
105	1	38	1	1	1	4.25	26																51	42	46	41	49	43	7	104	6.5	102	8	104	2	102	7	100	4	98	8	98	4	93	88	7	98	4	92
106	1	51	2	1	0	7.75	41			30	11				24		34	-10	18		34	-16							7.5	76	6	74	6.5	69	5	71	7		5.5		6		6		72	7.5	80	6.5	76
107	2	43	2	1	1	3	14.5	14.5	14.5	5.5	9	18	7	11	13	18	3	10	8	12	6	2	29	65	44	49	49	53	10	87	9	94	7.5	100	2.5	84									73	7.5	97	2.5	92
108	1	49	2		0	11.25	25			8	17	15	4	11	10		2	8	9		4	5	33	49	40	53	53	45	7	90	4	88	8	85	4	82	6	77	5	77					72	4	93	3	92
109	1	53	1		1	9.5	43																54	56	35	41	50	40	6.5	65	3	65	6	68	4	65									75	6	79	2	77
111	1	36	1	1	1	2.5	33			17	16	12	25		18		15	3	8		16	-8	38	65	50	49	50	55	5	100	3		6	94	5	105	5	95	3	99	3	98	0	85	71	3	90	0	84
112	1	30	2	1	1	6	53																45	53	56	43	46	53	7.5	81	2	82	6	82	3	80	8	83	5	79					69	7	103	3	90
113	2	32	2	0	0	14	27	29	27	19.5	7.5	27	13	14	25	18	25	0	20	22	18	2	43	65	35	60	31	49	7.5	77	5	70	7	69	5	59	7	63	2	63					58	7	62	6.5	62
114	2	44	2	0	0	46.25	13	24	13	13	0	9	6	3	22	33	38	-16	6	3	8	-2	42	49	44	41	55	55	6	76	0	69	7	73	2	66									57	6	74	3	71
115	1	45	2	1	0	21.25	35			46	-11	34	25	9	24		42	-18	22		26	-4	48	53	71	45	39	74	8	102	8	97	4	83	4	81	6	90	4	81					75	4	97	3	83
116	1	48	2	1	1	46.25	54.44			68	-13.56	19	12	7	51		40	11	15		16	-1	43	53	35	63	53	69	6	88	1.5	79	8	83	4	80									73	6	86	3	82
[truncated: 213 more columns]

## Sheet: Exposure Statistics
RandomNo	ExpoSession	Number	Duration
101	1	2	68
103	1	2	85
104	1	4	29
105	1	4	46
106	1	4	48
107	1	2	78
108	1	2	24
109	1	2	21
111	1	3	64
112	1	3	51
113	1	3	73
114	1	2	54
115	1	3	68
116	1	2	62
101	2	2	60
103	2	3	29
104	2	3	25
105	2	2	42
106	2	3	62
107	2	4	45
108	2	2	63
109	2	4	50
111	2	4	41
112	2	4	62
113	2	2	58
114	2	3	60
115	2	2	51
116	2	3	58
101	3	3	63
103	3	3	71
104	3	4	47
105	3	3	39
106	3	4	67
107	3	2	74
108	3	3	53
109	3	2	41
111	3	4	60
112	3	4	78
113	3	3	55
114	3	2	78
115	3	3	112
116	3	3	94
101	4	3	75
103	4	3	53
104	4	3	50
105	4	3	29
106	4	2	87
107	4	3	47
108	4	3	44
109	4	2	32
111	4	4	31
112	4	4	71
113	4	3	49
114	4	3	47
115	4	2	61
116	4	2	92
