# Supplementary material for: Treating patients with driving phobia by virtual reality exposure therapy – a pilot study
Source: PLOS journal article supplement (doi:10.1371/journal.pone.0226937), 2020-01-07
Supplement: S3 (10.1371/journal.pone.0226937.s003) [file journal.pone.0226937.s003]

| Code                                | Description of Item                                                                                    | Range | Labels                                          |
|-------------------------------------|--------------------------------------------------------------------------------------------------------|-------|-------------------------------------------------|
| <b>Statistics</b>                   |                                                                                                        |       |                                                 |
| RandomNo                            | Randomisation Number of patient                                                                        |       |                                                 |
| Group                               | Experimental Group                                                                                     |       | 1=Treatment Group<br>2=Waiting Group            |
| Sex                                 | Sex                                                                                                    |       | 1=male<br>2=female                              |
| ExpoSession                         | Exposure session                                                                                       | 1 – 4 |                                                 |
| Number                              | Number of drives per exposure session                                                                  |       |                                                 |
| Duration                            | Total duration of drives in [min] per driver and exposure session                                      |       |                                                 |
| Symptoms_Duration                   | [months]                                                                                               |       |                                                 |
| Responder                           | Responder: completed BAT with adequate driving behavior and could maintain success until the follow-up |       | 1=yes<br>0=no                                   |
| S_Preference_Expo                   | Preference of Exposure before treatment (screening)                                                    |       | 0=in vivo<br>1=virtual<br>2=combination of both |
| <b>Psychological Questionnaires</b> |                                                                                                        |       |                                                 |
| afq_pa_pre                          | Score AFQ prior to treatment (phobic avoidance items)                                                  |       |                                                 |
| afq_pre1_WG                         | Score AFQ anamnesis 1                                                                                  |       |                                                 |
| afq_pre2_WG                         | Score AFQ anamnesis 2                                                                                  |       |                                                 |
| afq_pa_post                         | Score AFQ post exposure                                                                                |       |                                                 |
| afq_pa_diff                         | Difference of AFQ score AFQ_pa_pre - afq_pa_post                                                       |       |                                                 |
| pss_sr_pre                          | Score PSS-SR prior to treatment                                                                        |       |                                                 |
| pss_sr_post                         | Score PSS-SR post treatment                                                                            |       |                                                 |
| pss_sr_diff                         | Difference of PSS-SR score pss_sr prä - pss_sr_post                                                    |       |                                                 |
| bai_pre                             | Score BAI prior to treatment, anamnesis 1                                                              |       |                                                 |
| bai_pre2                            | Score BAI prior to treatment, anamnesis 2 (WG)                                                         |       |                                                 |
| bai_post                            | Score BAI post treatment                                                                               |       |                                                 |
| bai_diff                            | Difference BAI score bai_pre – bai_post                                                                |       |                                                 |
| bdi_pre                             | Score BDI-II prior to treatment, anamnesis 1                                                           |       |                                                 |
| bdi_pre2                            | Score BDI-II prior to treatment, anamnesis 2 (WG)                                                      |       |                                                 |
| bdi_post                            | Score BDI-II post treatment                                                                            |       |                                                 |
| bdi_diff                            | Difference score BDI-II bdi_pre – bdi_post                                                             |       |                                                 |
| FPTM_strain                         | Score FPTM psychological strain                                                                        |       |                                                 |
| FPTM_hope                           | Score FPTM hope for improvement                                                                        |       |                                                 |

|                          |                                                                          |                                                                                                   |  |
|--------------------------|--------------------------------------------------------------------------|---------------------------------------------------------------------------------------------------|--|
| FPTM_denial              | Score FPTM denial of psychological need for care                         |                                                                                                   |  |
| FPTM_knowledge           | Score FPTM knowledge about therapy                                       |                                                                                                   |  |
| FPTM_initiative          | Score FPTM patient's effort to receive the therapy                       |                                                                                                   |  |
| FPTM_care                | Score FPTM perceived attention by others due to symptoms                 |                                                                                                   |  |
| <b>Exposure Sessions</b> |                                                                          |                                                                                                   |  |
| ES1_S1_SUD_Max           | ES1: Exposure Session 1; S1: Scenario 1; highest SUD during this drive   | Subjective units of distress (SUD) scale:<br>0=no distress to 10=highest anxiety, loss of control |  |
| ES1_S1_Pulse_Max         | ES1: Exposure Session 1; S1: Scenario 1; highest pulse during this drive |                                                                                                   |  |
| ES1_S1_SUD_End           | ES1: Exposure Session 1; S1: Scenario 1; SUD at the end of this drive    | Subjective units of distress (SUD) scale:<br>0=no distress to 10=highest anxiety, loss of control |  |
| ES1_S1_Pulse_End         | ES1: Exposure Session 1; S1: Scenario 1; pulse at the end of the drive   |                                                                                                   |  |
| ES1_S2_SUD_Max           | ES1: Exposure Session 1; S2: Scenario 2; highest SUD during this drive   | Subjective units of distress (SUD) scale:<br>0=no distress to 10=highest anxiety, loss of control |  |
| ES1_S2_Pulse_Max         | ES1: Exposure Session 1; S2: Scenario 2; highest pulse during this drive |                                                                                                   |  |
| ES1_S2_SUD_End           | ES1: Exposure Session 1; S2: Scenario 2; SUD at the end of this drive    | Subjective units of distress (SUD) scale:<br>0=no distress to 10=highest anxiety, loss of control |  |
| ES1_S2_SUD_End           | ES1: Exposure Session 1; S2: Scenario 2; pulse at the end of the drive   |                                                                                                   |  |
| ES1_S3_SUD_Max           | ES1: Exposure Session 1; S3: Scenario 3; highest SUD during this drive   | Subjective units of distress (SUD) scale:<br>0=no distress to 10=highest anxiety, loss of control |  |
| ES1_S3_Pulse_Max         | ES1: Exposure Session 1; S3: Scenario                                    |                                                                                                   |  |

|                      |                                                                                           |                                                                                                   |  |
|----------------------|-------------------------------------------------------------------------------------------|---------------------------------------------------------------------------------------------------|--|
|                      | 3; highest pulse during this drive                                                        |                                                                                                   |  |
| ES1_S3_SUD_End       | ES1: Exposure Session 1; S3: Scenario 3; SUD at the end of this drive                     | Subjective units of distress (SUD) scale:<br>0=no distress to 10=highest anxiety, loss of control |  |
| ES1_S3_SUD_End       | ES1: Exposure Session 1; S3: Scenario 3; pulse at the end of the drive                    |                                                                                                   |  |
| ES1_S4_SUD_Max       | ES1: Exposure Session 1; S4: Scenario 4; highest SUD during this drive                    | Subjective units of distress (SUD) scale:<br>0=no distress to 10=highest anxiety, loss of control |  |
| ES1_S4_Pulse_Max     | ES1: Exposure Session 1; S4: Scenario 4; highest pulse during this drive                  |                                                                                                   |  |
| ES1_S4_SUD_End       | ES1: Exposure Session 1; S4: Scenario 4; SUD at the end of this drive                     | Subjective units of distress (SUD) scale:<br>0=no distress to 10=highest anxiety, loss of control |  |
| ES1_S4_Pulse_End     | ES1: Exposure Session 1; S4: Scenario 4; pulse at the end of the drive                    |                                                                                                   |  |
| ES1_PulseBase        | ES1: Exposure Session 1; Pulse baseline during relaxation at the end of the session.      |                                                                                                   |  |
| ES2_S[1-4]_SUD_Max   | ES2: Exposure Session 2; S[1-4]: Scenarios 1-4; highest SUD during each of the drives     |                                                                                                   |  |
| ES2_S[1-4]_Pulse_Max | ES2: Exposure Session 2; S[1-4]: Scenarios 1-4; highest pulse during each of these drives |                                                                                                   |  |
| ES2_S[1-4]_SUD_End   | ES2: Exposure Session 2; S[1-4]: Scenarios 1-4; SUD at the end of each drive              |                                                                                                   |  |
| ES2_S[1-4]_Pulse_End | ES2: Exposure Session 2; S[1-4]: Scenarios 1-4; pulse at the end of each drive            |                                                                                                   |  |
| ES2_PulseBase        | ES2: Exposure Session 2; Pulse baseline during relaxation at the end of the session.      |                                                                                                   |  |
| ES3_S[1-4]_SUD_Max   | ES3: Exposure Session 3; S[1-4]: Scenarios 1-4; highest SUD during each of the drives     |                                                                                                   |  |
| ES3_S[1-4]_Pulse_Max | ES3: Exposure Session 3; S[1-4]: Scenarios 1-4; highest pulse during each of these drives |                                                                                                   |  |

|                      |                                                                                                             |  |  |
|----------------------|-------------------------------------------------------------------------------------------------------------|--|--|
| ES3_S[1-4]_SUD_End   | ES3: Exposure Session 3; S[1-4]: Scenarios 1-4; SUD at the end of each drive                                |  |  |
| ES3_S[1-4]_Pulse_End | ES3: Exposure Session 3; S[1-4]: Scenarios 1-4; pulse at the end of each drive                              |  |  |
| ES3_PulseBase        | ES3: Exposure Session 3; Pulse baseline during relaxation at the end of the session.                        |  |  |
| ES4_S[1-4]_SUD_Max   | ES4: Exposure Session 4; S[1-4]: Scenarios 1-4; highest SUD during each of the drives                       |  |  |
| ES4_S[1-4]_Pulse_Max | ES4: Exposure Session 4; S[1-4]: Scenarios 1-4; highest pulse during each of these drives                   |  |  |
| ES4_S[1-4]_SUD_End   | ES4: Exposure Session 4; S[1-4]: Scenarios 1-4; SUD at the end of each drive                                |  |  |
| ES4_S[1-4]_Pulse_End | ES4: Exposure Session 4; S[1-4]: Scenarios 1-4; pulse at the end of each drive                              |  |  |
| ES4_PulseBase        | ES4: Exposure Session 4; Pulse baseline during relaxation at the end of the session.                        |  |  |
| mean_max_SUD_ES1     | Mean maximum SUD during Exposure session 1 (ES1_S1_SUD_Max, ES1_S2_SUD_Max, ES1_S3_SUD_Max, ES1_S4_SUD_Max) |  |  |
| mean_max_SUD_ES2     | Mean maximum SUD during Exposure session 2 (ES2_S1_SUD_Max, ES2_S2_SUD_Max, ES2_S3_SUD_Max, ES2_S4_SUD_Max) |  |  |
| mean_max_SUD_ES3     | Mean maximum SUD during Exposure session 3 (ES3_S1_SUD_Max, ES3_S2_SUD_Max, ES3_S3_SUD_Max, ES3_S4_SUD_Max) |  |  |
| mean_max_SUD_ES4     | Mean maximum SUD during Exposure session 4 (ES4_S1_SUD_Max, ES4_S2_SUD_Max, ES4_S3_SUD_Max, ES4_S4_SUD_Max) |  |  |
| mean_end_SUD_ES1     | Mean end SUD of exposure session 1 (ES1_S1_SUD_End, ES1_S2_SUD_End, ES1_S3_SUD_End, ES1_S4_SUD_End)         |  |  |
| mean_end_SUD_ES2     | Mean end SUD of exposure session 2 (ES2_S1_SUD_End, ES2_S2_SUD_End, ES2_S3_SUD_End, ES2_S4_SUD_End)         |  |  |
| mean_end_SUD_ES3     | Mean end SUD of exposure session 3                                                                          |  |  |

|                          |                                                                                                                                                            |  |  |
|--------------------------|------------------------------------------------------------------------------------------------------------------------------------------------------------|--|--|
|                          | (ES3_S1_SUD_End, ES3_S2_SUD_End, ES3_S3_SUD_End, ES3_S4_SUD_End)                                                                                           |  |  |
| mean_end_SUD_ES4         | Mean end SUD of exposure session 4 (ES4_S1_SUD_End, ES4_S2_SUD_End, ES4_S3_SUD_End, ES4_S4_SUD_End)                                                        |  |  |
| ES1_S[1-4]_Puls_max_diff | Baseline corrected maximum heart rate:<br>ES1: Exposure 1; S[1-4]: Scenarios 1-4;<br>Difference (ES1_S[1-4]_Puls_Max - ES1_PulsBase)                       |  |  |
| ES2_S[1-4]_Puls_max_diff | Baseline corrected maximum heart rate:<br>ES2: Exposure 2; S[1-4]: Scenarios 1-4;<br>Difference (ES2_S[1-4]_Puls_Max - ES2_PulsBase)                       |  |  |
| ES3_S[1-4]_Puls_max_diff | Baseline corrected maximum heart rate:<br>ES3: Exposure 3; S[1-4]: Scenarios 1-4;<br>Difference (ES3_S[1-4]_Puls_Max - ES3_PulsBase)                       |  |  |
| ES4_S[1-4]_Puls_max_diff | Baseline corrected maximum heart rate:<br>ES4: Exposure 4; S[1-4]: Scenarios 1-4;<br>Difference (ES4_S[1-4]_Puls_Max - ES4_PulsBase)                       |  |  |
| ES1_S[1-4]_Puls_End_diff | Baseline corrected heart rate at the end of each drive:<br>ES1: Exposure 1; S[1-4]: Scenarios 1-4;<br>Difference (ES1_S[1-4]_Puls_end - ES1_PulsBase)      |  |  |
| ES2_S[1-4]_Puls_End_diff | Baseline corrected heart rate at the end of each drive:<br>ES2: Exposure 2; S[1-4]: Scenarios 1-4;<br>Difference (ES2_S[1-4]_Puls_end - ES2_PulsBase)      |  |  |
| ES3_S[1-4]_Puls_End_diff | Baseline corrected heart rate at the end of each drive:<br>ES3: Exposure 3; S[1-4]: Scenarios 1-4;<br>Difference (ES3_S[1-4]_Puls_end - ES3_PulsBase)      |  |  |
| ES4_S[1-4]_Puls_End_diff | Baseline corrected heart rate at the end of each drive:<br>ES4: Exposure 4; S[1-4]: Scenarios 1-4;<br>Difference (ES4_S[1-4]_Puls_end - ES4_PulsBase)      |  |  |
| mean_max_Puls_ES1        | MEAN baseline corrected maximum heart rate per exposure session 1 (ES1_S1_Puls_max_diff, ES1_S2_Puls_max_diff, ES1_S3_Puls_max_diff, ES1_S4_Puls_max_diff) |  |  |
| mean_max_Puls_ES2        | MEAN baseline corrected maximum                                                                                                                            |  |  |

|                                       |                                                                                                                                                                          |                                                                                                                          |               |
|---------------------------------------|--------------------------------------------------------------------------------------------------------------------------------------------------------------------------|--------------------------------------------------------------------------------------------------------------------------|---------------|
|                                       | heart rate per exposure session 2<br>(ES2_S1_Puls_max_diff,<br>ES2_S2_Puls_max_diff,<br>ES2_S3_Puls_max_diff,<br>ES2_S4_Puls_max_diff)                                   |                                                                                                                          |               |
| mean_max_Puls_ES3                     | MEAN baseline corrected maximum heart rate per exposure session 3<br>(ES3_S1_Puls_max_diff,<br>ES3_S2_Puls_max_diff,<br>ES3_S3_Puls_max_diff,<br>ES3_S4_Puls_max_diff)   |                                                                                                                          |               |
| mean_max_Puls_ES4                     | MEAN baseline corrected maximum heart rate per exposure session 4<br>(ES4_S1_Puls_max_diff,<br>ES4_S2_Puls_max_diff,<br>ES4_S3_Puls_max_diff,<br>ES4_S4_Puls_max_diff)   |                                                                                                                          |               |
| mean_End_Puls_ES1                     | MEAN baseline corrected heart rate at the end of exposure session 1<br>(ES1_S1_Puls_End_diff,<br>ES1_S2_Puls_End_diff,<br>ES1_S3_Puls_End_diff,<br>ES1_S4_Puls_End_diff) |                                                                                                                          |               |
| mean_End_Puls_ES2                     | MEAN baseline corrected heart rate at the end of exposure session 2<br>(ES2_S1_Puls_End_diff,<br>ES2_S2_Puls_End_diff,<br>ES2_S3_Puls_End_diff,<br>ES2_S4_Puls_End_diff) |                                                                                                                          |               |
| mean_End_Puls_ES3                     | MEAN baseline corrected heart rate at the end of exposure session 3<br>(ES3_S1_Puls_End_diff,<br>ES3_S2_Puls_End_diff,<br>ES3_S3_Puls_End_diff,<br>ES3_S4_Puls_End_diff) |                                                                                                                          |               |
| mean_End_Puls_ES4                     | MEAN baseline corrected heart rate at the end of exposure session 4<br>(ES4_S1_Puls_End_diff,<br>ES4_S2_Puls_End_diff,<br>ES4_S3_Puls_End_diff,<br>ES4_S4_Puls_End_diff) |                                                                                                                          |               |
| <b>Driving performance in the BAT</b> |                                                                                                                                                                          |                                                                                                                          |               |
| wheel_sud.0                           | Hypothetical question during screening:<br>“If you had the chance to drive with a driving instructor right now, would you sit behind the wheel?”                         | Subjective units of distress (SUD) scale:<br>0=no distress to 10=highest anxiety, loss of control;<br>11=would not do it |               |
| wheel_dic.0                           | Hypothetical SUD sitting behind the                                                                                                                                      |                                                                                                                          | 0=not avoided |

|               |                                                                                                                                                                           |                                                                                              |                                                    |
|---------------|---------------------------------------------------------------------------------------------------------------------------------------------------------------------------|----------------------------------------------------------------------------------------------|----------------------------------------------------|
|               | wheel (screening) dichotomized                                                                                                                                            |                                                                                              | (SUD <6)<br>1=avoided<br>(SUD ≥6)                  |
| wheel_sud.1   | Hypothetical question during anamnesis 1:<br>“If you had the chance to drive with a driving instructor right now, would you sit behind the wheel?”                        | SUD scale:<br>0=no distress to<br>10=highest anxiety, loss of control;<br>11=would not do it |                                                    |
| wheel_dic.1   | Hypothetical SUD sitting behind the wheel (anamnesis 1) dichotomized                                                                                                      |                                                                                              | 0=not avoided<br>(SUD <6)<br>1=avoided<br>(SUD ≥6) |
| wheel_sud.2   | Hypothetical question during anamnesis 2 (WG), anamnesis 1 (TG):<br>“If you had the chance to drive with a driving instructor right now, would you sit behind the wheel?” | SUD scale:<br>0=no distress to<br>10=highest anxiety, loss of control;<br>11=would not do it |                                                    |
| wheel_dic.2   | Hypothetical SUD sitting behind the wheel (anamnesis 2 (WG), anamnesis 1 (TG)) dichotomized                                                                               |                                                                                              | 0=not avoided<br>(SUD <6)<br>1=avoided<br>(SUD ≥6) |
| wheel_sud.3   | Hypothetical question post exposure:<br>“If you had the chance to drive with a driving instructor right now, would you sit behind the wheel?”                             | SUD scale:<br>0=no distress to<br>10=highest anxiety, loss of control;<br>11=would not do it |                                                    |
| wheel_dic.3   | Hypothetical SUD sitting behind the wheel (post exposure) dichotomized                                                                                                    |                                                                                              | 0=not avoided<br>(SUD <6)<br>1=avoided<br>(SUD ≥6) |
| wheel_dic.4   | SUD during BAT: sitting behind the wheel                                                                                                                                  |                                                                                              | 0=not avoided<br>(any more)<br>1=still avoided     |
| wheel_dic.42  | SUD during BAT: sitting behind the wheel (1 also for tasks originally mastered)                                                                                           |                                                                                              | 0=not avoided<br>(any more)<br>1=still avoided     |
| wheel_dic.5   | Hypothetical SUD during booster interview: sitting behind the wheel                                                                                                       |                                                                                              | 0=not avoided<br>(any more)<br>1=still avoided     |
| wheel_dic.6   | Hypothetical SUD during follow-up interview: sitting behind the wheel                                                                                                     |                                                                                              | 0=not avoided<br>(any more)<br>1=still avoided     |
| parking_sud.0 | Hypothetical question during screening:<br>“If you had the chance to drive with a driving instructor right now, would                                                     | SUD scale:<br>0=no distress to<br>10=highest anxiety, loss of                                |                                                    |

|                     |                                                                                                                                                                 |                                                                                              |                                              |
|---------------------|-----------------------------------------------------------------------------------------------------------------------------------------------------------------|----------------------------------------------------------------------------------------------|----------------------------------------------|
|                     | you drive around a parking area?"                                                                                                                               | control;<br>11=would not do it                                                               |                                              |
| parking_dic.0       | Hypothetical SUD driving around a parking area (screening) dichotomized                                                                                         |                                                                                              | 0=not avoided (SUD <6)<br>1=avoided (SUD ≥6) |
| parking_sud.[1-3]   | See descriptions for wheel_sud                                                                                                                                  |                                                                                              |                                              |
| parking_dic.[1-6]   | See descriptions for wheel_dic                                                                                                                                  |                                                                                              |                                              |
| block_sud.0         | Hypothetical question during screening:<br>"If you had the chance to drive with a driving instructor right now, would you drive around the block?"              | SUD scale:<br>0=no distress to<br>10=highest anxiety, loss of control;<br>11=would not do it |                                              |
| block_dic.0         | Hypothetical SUD driving around the block (screening) dichotomized                                                                                              |                                                                                              | 0=not avoided (SUD <6)<br>1=avoided (SUD ≥6) |
| block_sud.[1-3]     | See descriptions for wheel_sud                                                                                                                                  |                                                                                              |                                              |
| block_dic.[1-6]     | See descriptions for wheel_dic                                                                                                                                  |                                                                                              |                                              |
| ruralroad_sud.0     | Hypothetical question during screening:<br>"If you had the chance to drive with a driving instructor right now, would you drive on a rural road?"               | SUD scale:<br>0=no distress to<br>10=highest anxiety, loss of control;<br>11=would not do it |                                              |
| ruralroad_dic.0     | Hypothetical SUD driving on rural road (screening) dichotomized                                                                                                 |                                                                                              | 0=not avoided (SUD <6)<br>1=avoided (SUD ≥6) |
| ruralroad_sud.[1-3] | See descriptions for wheel_sud                                                                                                                                  |                                                                                              |                                              |
| ruralroad_dic.[1-6] | See descriptions for wheel_dic                                                                                                                                  |                                                                                              |                                              |
| twolane_sud.0       | Hypothetical question during screening:<br>"If you had the chance to drive with a driving instructor right now, would you drive on a main road with two lanes?" | SUD scale:<br>0=no distress to<br>10=highest anxiety, loss of control;<br>11=would not do it |                                              |
| twolane_dic.0       | Hypothetical SUD driving on main road with two lanes (screening) dichotomized                                                                                   |                                                                                              | 0=not avoided (SUD <6)<br>1=avoided (SUD ≥6) |
| twolane_sud.[1-3]   | See descriptions for wheel_sud                                                                                                                                  |                                                                                              |                                              |
| twolane_dic.[1-6]   | See descriptions for wheel_dic                                                                                                                                  |                                                                                              |                                              |
| highway_sud.0       | Hypothetical question during screening:<br>"If you had the chance to drive with a driving instructor right now, would                                           | SUD scale:<br>0=no distress to<br>10=highest anxiety, loss of                                |                                              |



|                         |                                                                                                                                                    |                                                                                                       |                                                                                             |
|-------------------------|----------------------------------------------------------------------------------------------------------------------------------------------------|-------------------------------------------------------------------------------------------------------|---------------------------------------------------------------------------------------------|
|                         | you drive on a highway?"                                                                                                                           | control;<br>11=would not do it                                                                        |                                                                                             |
| highway_dic.0           | Hypothetical SUD driving on a highway (screening) dichotomized                                                                                     |                                                                                                       | 0=not avoided (SUD <6)<br>1=avoided (SUD ≥6)                                                |
| highway_sud.[1-3]       | See descriptions for wheel_sud                                                                                                                     |                                                                                                       |                                                                                             |
| highway_dic.[1-6]       | See descriptions for wheel_dic                                                                                                                     |                                                                                                       |                                                                                             |
| urban_sud.0             | Hypothetical question during screening:<br>"If you had the chance to drive with a driving instructor right now, would you drive on an urban area?" | SUD scale:<br>0=no distress to control;<br>10=highest anxiety, loss of control;<br>11=would not do it |                                                                                             |
| urban_dic.0             | Hypothetical SUD driving on an urban area (screening) dichotomized                                                                                 |                                                                                                       | 0=not avoided (SUD <6)<br>1=avoided (SUD ≥6)                                                |
| urban_sud.[1-3]         | See descriptions for wheel_sud                                                                                                                     |                                                                                                       |                                                                                             |
| urban_dic.[1-6]         | See descriptions for wheel_dic                                                                                                                     |                                                                                                       |                                                                                             |
| hypBAT_before           | Hypothetical BAT before number of tasks mastered                                                                                                   |                                                                                                       |                                                                                             |
| actBAT_after            | Actual BAT after number of tasks mastered                                                                                                          |                                                                                                       |                                                                                             |
| BAT_instructor_assessm  | General assessment of driving performance during the BAT, as rated by the driving instructor                                                       |                                                                                                       | 0=normal<br>1=slightly conspicuous<br>2=substantially conspicuous<br>3=severely conspicuous |
| BAT_instructor_interven | Number of interventions by the driving instructor during the BAT                                                                                   |                                                                                                       |                                                                                             |
| BAT_Psych_gs1           | Number of driving errors regarding driving with higher speed than speed limit                                                                      |                                                                                                       |                                                                                             |
| BAT_Psych_gs2           | Number of driving errors regarding maladjusted speed (maladjusted acceleration or deceleration; offensive driving)                                 |                                                                                                       |                                                                                             |
| BAT_Psych_gs3           | Number of driving errors regarding driving too slow (unconfident driving)                                                                          |                                                                                                       |                                                                                             |
| BAT_Psych_ab12          | Number of driving errors regarding longitudinal distances being too small                                                                          |                                                                                                       |                                                                                             |
| BAT_Psych_ab3           | Number of driving errors regarding lateral distances being too small                                                                               |                                                                                                       |                                                                                             |
| BAT_Psych_fb1           | Number of driving errors regarding poor lane keeping                                                                                               |                                                                                                       |                                                                                             |
| BAT_Psych_fb2           | Number of driving errors regarding lane changes                                                                                                    |                                                                                                       |                                                                                             |

|                              |                                                                                           |                                                                |                                                 |
|------------------------------|-------------------------------------------------------------------------------------------|----------------------------------------------------------------|-------------------------------------------------|
| BAT_Psych_fb3                | Number of driving errors regarding driving on inappropriate lanes                         |                                                                |                                                 |
| BAT_Psych_fb4                | Number of driving errors regarding driving on inadmissible lanes                          |                                                                |                                                 |
| BAT_Psych_si1                | Number of driving errors regarding missing shoulder glances                               |                                                                |                                                 |
| BAT_Psych_si2                | Number of driving errors regarding right of way                                           |                                                                |                                                 |
| BAT_Psych_si3                | Number of driving errors regarding overcautious shoulder glances                          |                                                                |                                                 |
| BAT_Psych_ko1                | Number of driving errors regarding signaling                                              |                                                                |                                                 |
| BAT_Psych_ko2                | Number of driving errors regarding unclear communication                                  |                                                                |                                                 |
| BAT_Psych_ko3                | Number of driving errors regarding interaction with other traffic participants' signaling |                                                                |                                                 |
| BAT_Psych_nav                | Number of driving errors regarding navigation                                             |                                                                |                                                 |
| BAT_Psych_gf1                | Number of driving errors regarding endangering VRU                                        |                                                                |                                                 |
| BAT_Psych_gf2                | Number of driving errors regarding endangering motorized traffic participants             |                                                                |                                                 |
| <b>Follow-Up: Evaluation</b> |                                                                                           |                                                                |                                                 |
| FU_Preference_Expo           | Preference of Exposure after the treatment (follow-up)                                    |                                                                | 0=in vivo<br>1=virtual<br>2=combination of both |
| FU_E_1                       | The content of the treatment was comprehensible.                                          | 1=do not agree at all<br>7=agree strongly<br>8=don't know      |                                                 |
| FU_E_2                       | The procedures of the treatment were comprehensible.                                      |                                                                |                                                 |
| FU_E_8                       | Driving in the simulation helped me overcome my fear.                                     |                                                                |                                                 |
| FU_E_9                       | I experienced driving in the simulation to be realistic.                                  |                                                                |                                                 |
| FU_E_10                      | Driving in the simulation made driving under real traffic conditions easier for me.       |                                                                |                                                 |
| FU_E_11                      | Treatment should be made accessible to broad public.                                      |                                                                |                                                 |
| FU_E_12                      | The difficulty of driving tasks was ....                                                  | 1=too easy<br>4=appropriate<br>7=too difficult<br>8=don't know |                                                 |
| FU_E_13                      | The speed of the proceedings was...                                                       | 1=too slow<br>4=appropriate<br>7=too fast<br>8=don't know      |                                                 |

|         |                                     |                                                            |  |
|---------|-------------------------------------|------------------------------------------------------------|--|
| FU_E_15 | The time frame was...               | 1=too short<br>4=appropriate<br>7=too long<br>8=don't know |  |
| FU_E_19 | Overall evaluation of the treatment | German school<br>grade:<br>1=very good<br>6=fail           |  |
